# Supplementary material
Source: PubMed Central journal article supplement (PMC2998620)
Supplement: mmc1.pdf [file mmc1.pdf]

## Supporting Material

### KCNE1 remodels the voltage sensor of Kv7.1 to modulate channel function

Dick Wu, Hua Pan, Kelli Delaloye, and Jianmin Cui

#### Supporting Material

Figure S1: Current traces and G-V relationships from mutations of R1, R2 and Q3. Scale: R1Q 3  $\mu\text{A}$ , R1Q+KCNE1 15  $\mu\text{A}$ , R1E 1  $\mu\text{A}$ , R1E+KCNE1 20  $\mu\text{A}$ , R2Q 2  $\mu\text{A}$ , R2Q+KCNE1 40  $\mu\text{A}$ , R2E 0.6  $\mu\text{A}$ , R2E+KCNE1 10  $\mu\text{A}$ , R2K 3  $\mu\text{A}$ , R2K+KCNE1 10  $\mu\text{A}$ , Q3R 1.5  $\mu\text{A}$ , Q3R+KCNE1 4  $\mu\text{A}$ , Q3E 6  $\mu\text{A}$ , Q3E+KCNE1 20  $\mu\text{A}$ ; 2 s. In this and the Supplementary Fig. 4 G-V plots, the black curves are fittings of the Boltzmann equation to the mutants and the gray curves are G-V relations of WT Kv7.1 (left) and Kv7.1+KCNE1 (right).

Figure S2: Current traces and G-V relationships from mutations of R4, H5 and R6. Scale: R4Q 10  $\mu\text{A}$ , R4Q+KCNE1 40  $\mu\text{A}$ , R4E 2  $\mu\text{A}$ , R4E+KCNE1 3  $\mu\text{A}$ , H5Q 1  $\mu\text{A}$ , H5R 2  $\mu\text{A}$ , H5R+KCNE1 4  $\mu\text{A}$ , H5Q+KCNE1 10  $\mu\text{A}$ , H5E 1.5  $\mu\text{A}$ , H5E+KCNE1 20  $\mu\text{A}$ , R6Q 2  $\mu\text{A}$ , R6Q+KCNE1 1  $\mu\text{A}$ , R6E 2  $\mu\text{A}$ , R6E+KCNE1 1  $\mu\text{A}$ ; 2 s.

Figure S3: Current traces of WT and S4 Trp mutations in Kv7.1 channels. Scale: black, red and blue vertical bars represent 1, 2 and 3  $\mu\text{A}$ , respectively; 2 s. The test pulses for different mutants in this and subsequent supplementary figures differ, but are all between the -120 and 100 mV ranges with 10 mV increments.

Figure S4: Current traces of WT and S4 Trp mutations in Kv7.1+KCNE1 channels. Scale: black, red, blue, green and brown vertical bars represent 1, 2, 3, 10 and 15  $\mu\text{A}$ , respectively; 2 s.

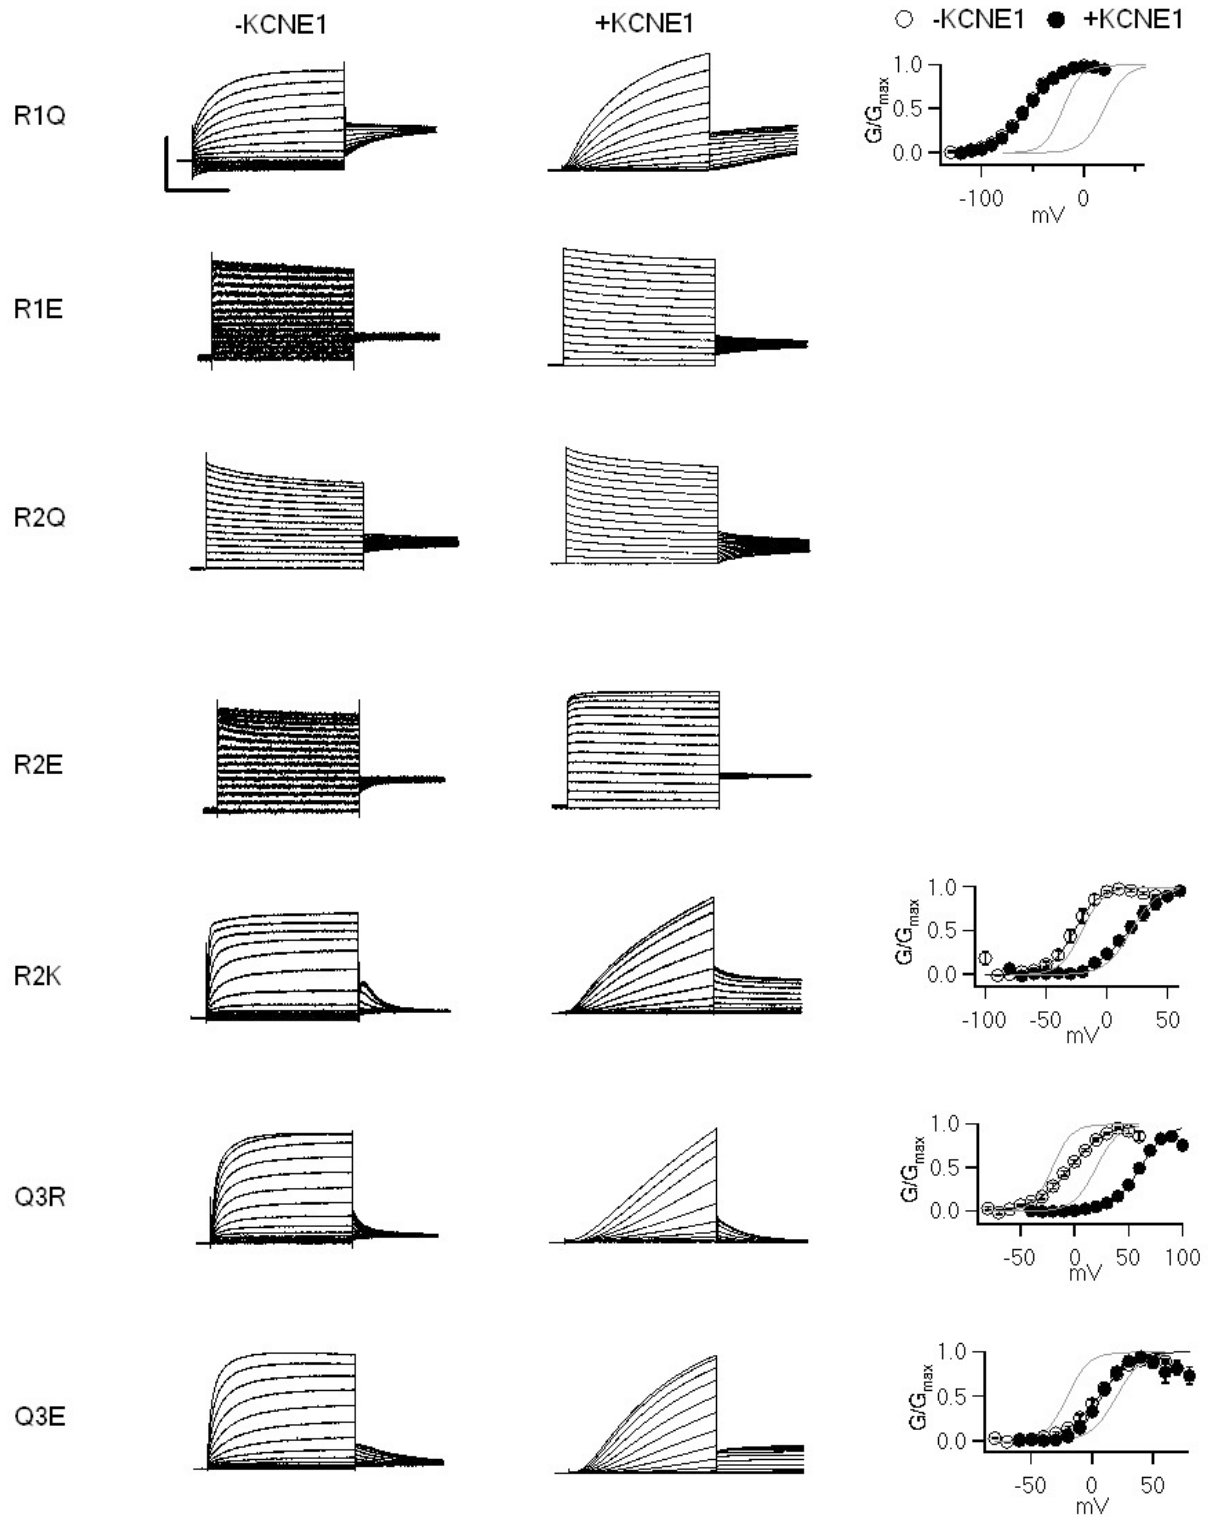

**Figure S1**

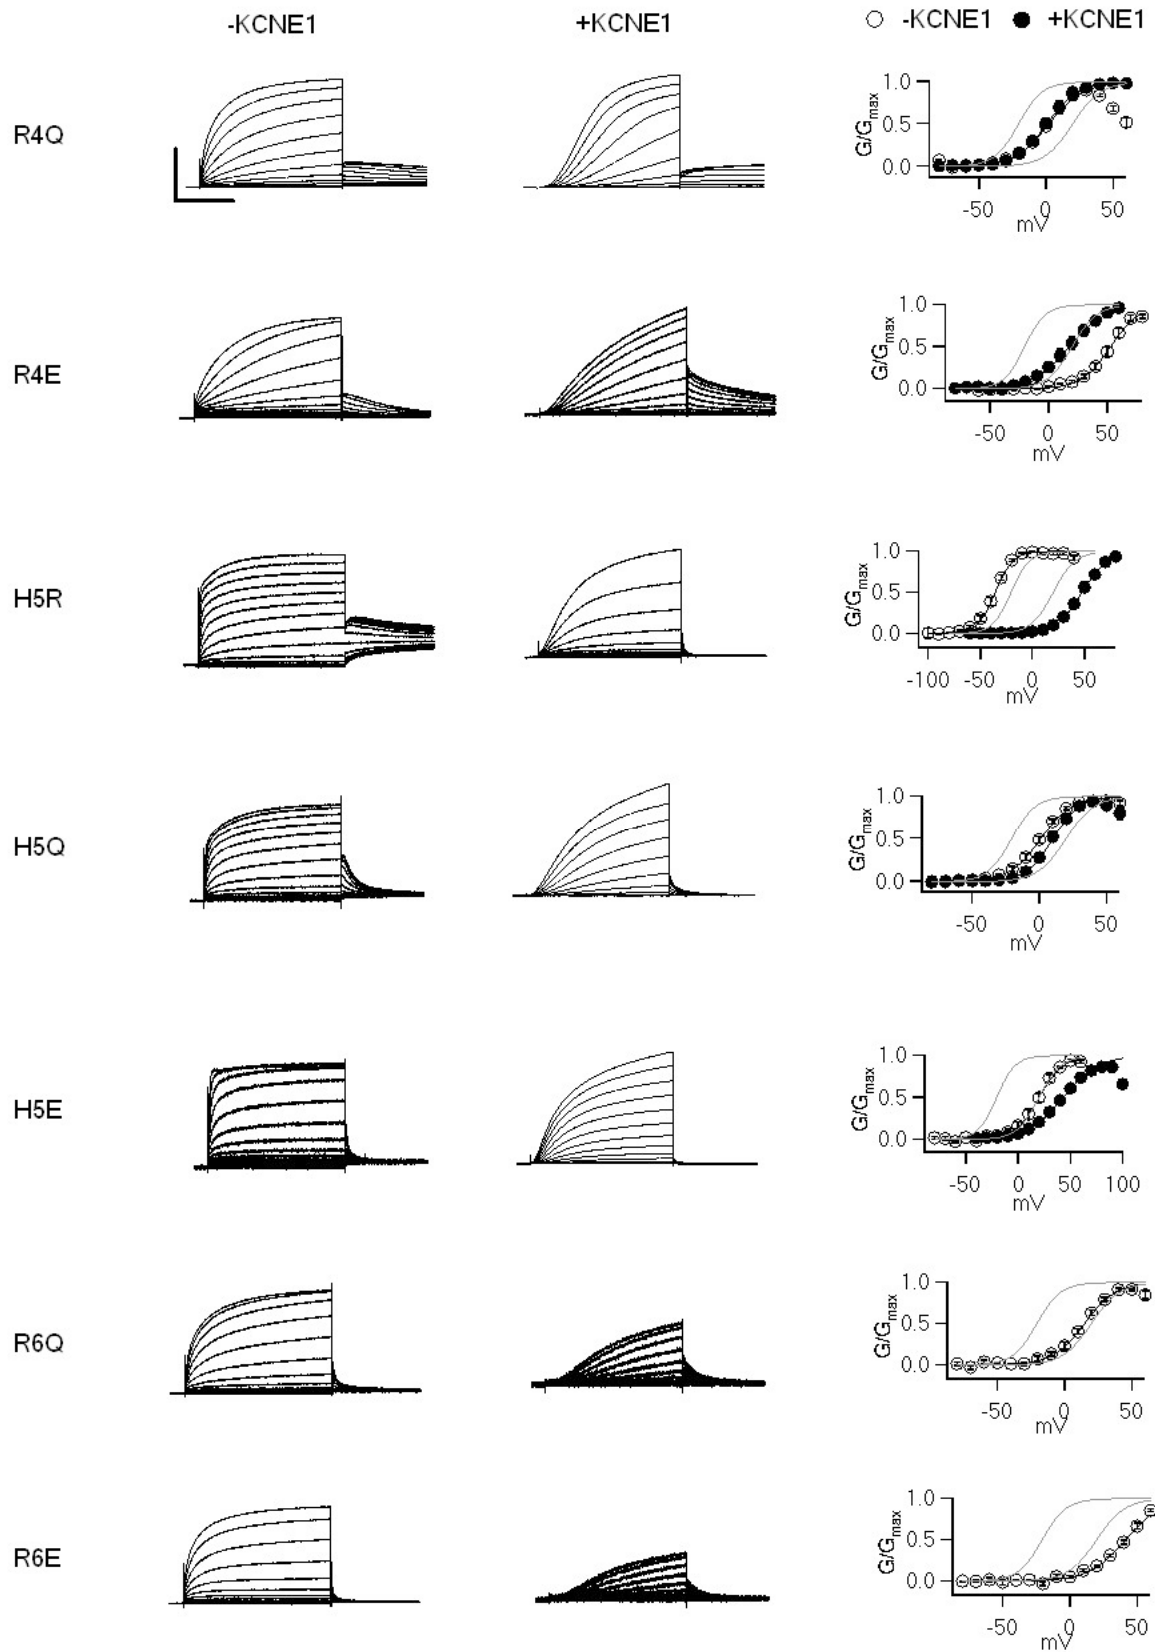

Figure S2

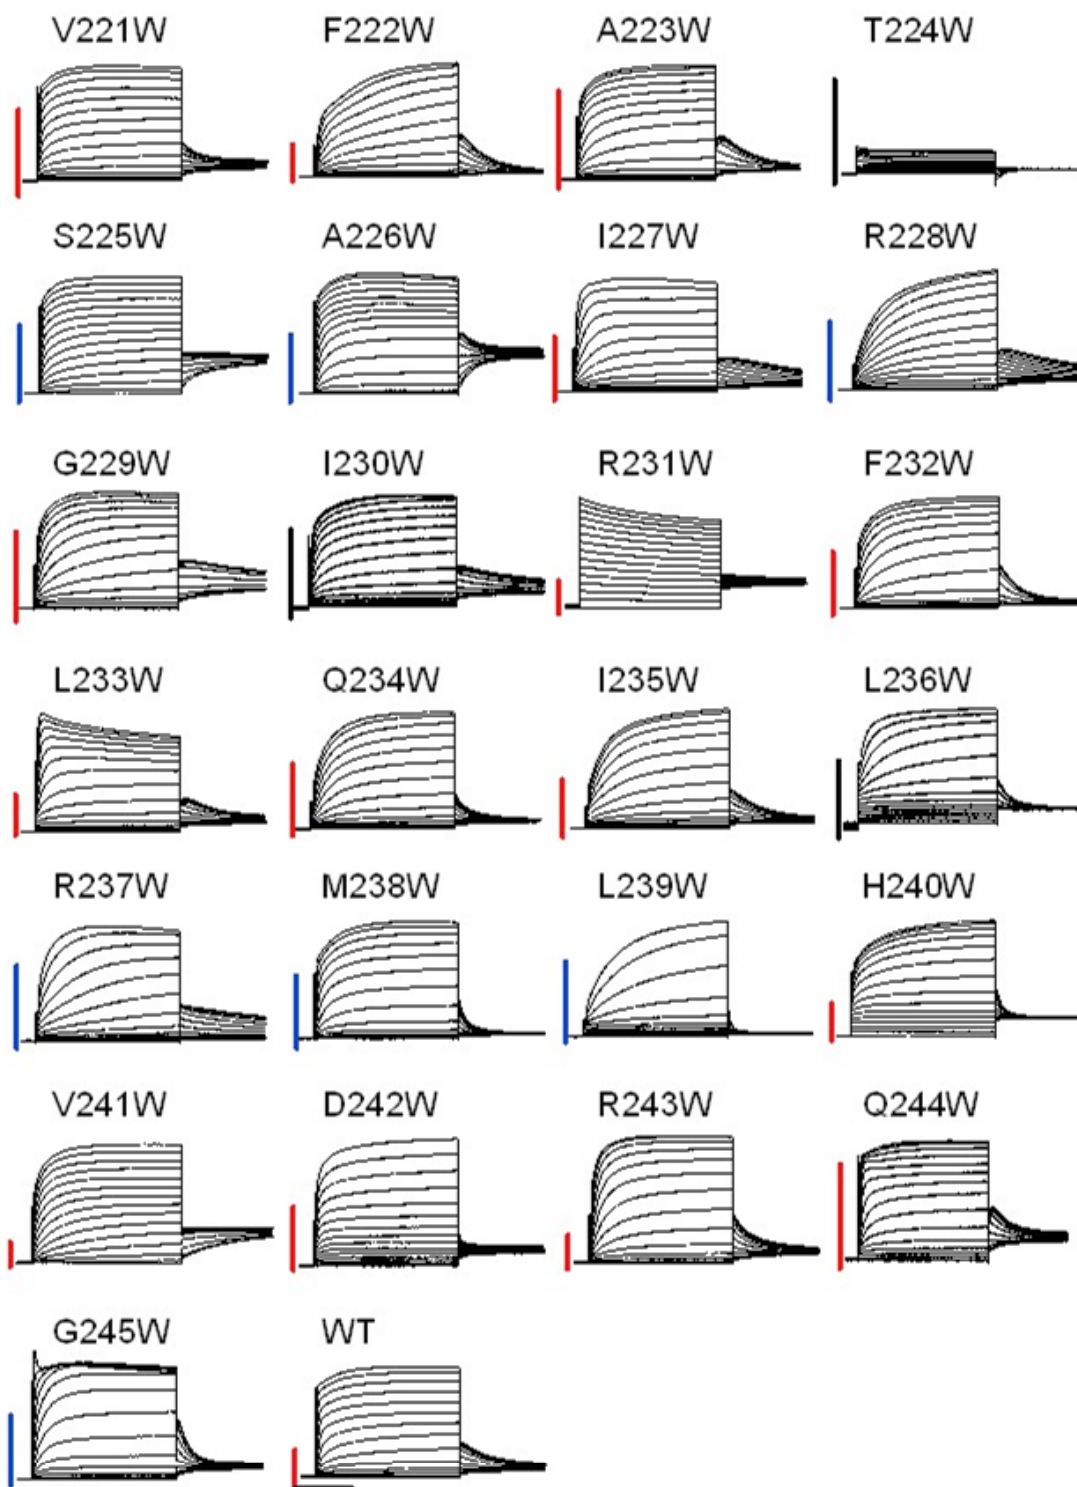

Figure S3

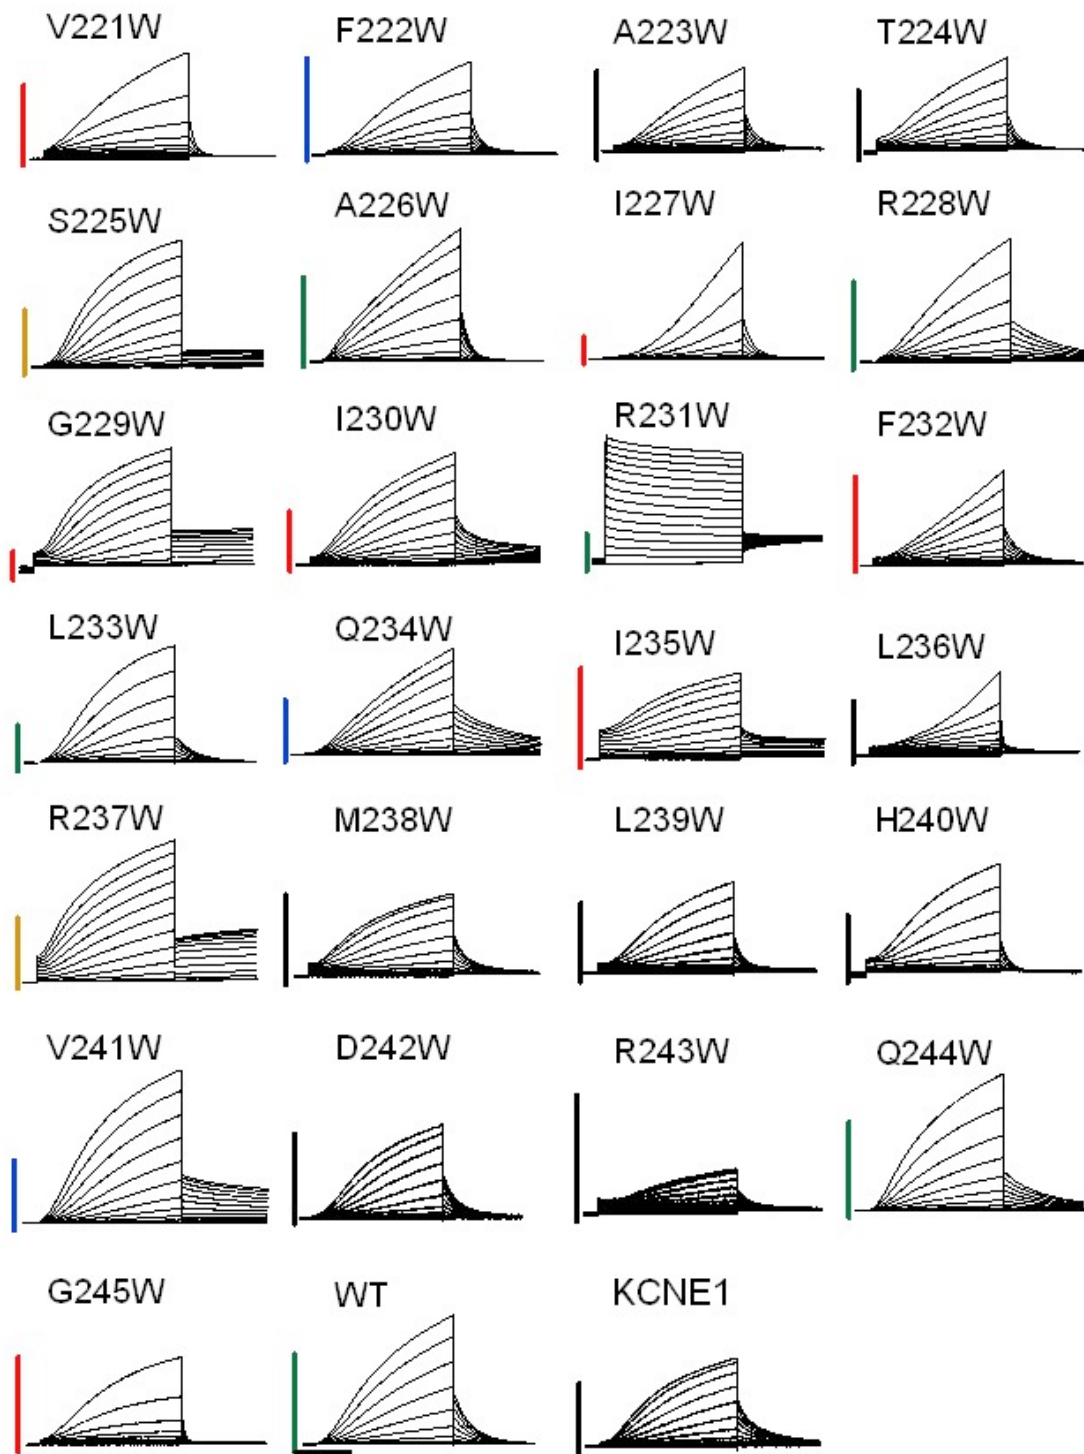

**Figure S4**
